# Supplementary material
Source: HighWire-hosted journal article supplement (https://www.cmajopen.ca/highwire/filestream/81373/field_highwire_adjunct_files/1/2019-0164-2-at.pdf)
Supplement: 2019-0164-2-at.pdf [file 2019-0164-2-at.pdf]

**Appendix 2 (as supplied by the authors):** Definitions of quality of care indicators for early-stage chronic kidney disease.(2,3)

| Indicator Category                    | Numerator                                                                                                                                                                                                                                                                                                                  | Denominator                                                                                                                                                                             |
|---------------------------------------|----------------------------------------------------------------------------------------------------------------------------------------------------------------------------------------------------------------------------------------------------------------------------------------------------------------------------|-----------------------------------------------------------------------------------------------------------------------------------------------------------------------------------------|
| Screening for chronic kidney disease  | Patients who receive a repeat outpatient serum creatinine test in the following 6 months, based on physician billing codes                                                                                                                                                                                                 | Patients in the prevalent diabetes cohort with an initial outpatient eGFR <60 mL/min/1.73 m <sup>2</sup> (sub-cohort 1)                                                                 |
|                                       | Patients who receive an outpatient urine albumin in the following 6 months, based on physician billing codes                                                                                                                                                                                                               |                                                                                                                                                                                         |
|                                       | Patients who receive a repeat outpatient urine albumin test in the following 6 months, based on physician billing codes                                                                                                                                                                                                    | Patients in the prevalent diabetes cohort with an initial outpatient ACR >3 mg/mmol (sub-cohort 2)                                                                                      |
| Monitoring of kidney function         | Patients with an outpatient serum creatinine test in the following 18 months following the date of the second eGFR value, based on physician billing codes                                                                                                                                                                 | Patients in the prevalent diabetes cohort with 2 eGFR values <60 mL/min/1.73 m <sup>2</sup> separated by at least 3 months but less than 18 months (sub-cohort 3)                       |
|                                       | Patients with an outpatient urine albumin in the 18 months following the date of the second eGFR value, based on physician billing codes                                                                                                                                                                                   |                                                                                                                                                                                         |
| Use of appropriate medication         | Patients who are not prescribed an NSAID for longer than 2 weeks at any time in the 1 year following the date of the second eGFR value                                                                                                                                                                                     | Patients in the prevalent diabetes cohort with 2 eGFR values <60 mL/min/1.73 m <sup>2</sup> separated by at least 3 months but less than 18 months (sub-cohort 3) AND aged 66 and older |
|                                       | Patients who are not simultaneously receiving both an ACE inhibitor and an ARB at any time in the 1 year following the date of the second eGFR value.<br>This was defined as a prescription for an ARB filled during the continuous use of an ACE inhibitor or an ACE inhibitor filled during the continuous use of an ARB |                                                                                                                                                                                         |
|                                       | Patients who are prescribed an ACE inhibitor or ARB at any time in the 1 year following the date of the second eGFR value                                                                                                                                                                                                  |                                                                                                                                                                                         |
|                                       | Patients who are prescribed a statin at any time in the 1 year following the date of the second eGFR value                                                                                                                                                                                                                 | Patients in the prevalent diabetes cohort with 2 eGFR values <60 mL/min/1.73 m <sup>2</sup> separated by at least 3 months but less than 18 months (sub-cohort 3) AND aged 66 to 80     |
| Monitoring of ACE inhibitors and ARBs | Patients who receive an outpatient serum creatinine test 7 to 30 days after initial prescription date, based on physician billing codes                                                                                                                                                                                    | Patients in the prevalent diabetes cohort with 2 eGFR values <60 mL/min/1.73 m <sup>2</sup> separated by at least 3                                                                     |

|                                        |                                                                                                                                                                        |                                                                                                                                                                                                                                                                                                                                                                                                                                              |
|----------------------------------------|------------------------------------------------------------------------------------------------------------------------------------------------------------------------|----------------------------------------------------------------------------------------------------------------------------------------------------------------------------------------------------------------------------------------------------------------------------------------------------------------------------------------------------------------------------------------------------------------------------------------------|
|                                        | Patients who receive an outpatient serum potassium test 7 to 30 days after initial prescription date, based on physician billing codes                                 | months but less than 18 months (sub-cohort 3)<br>AND<br>aged 66 and older who received an initial prescription for an ACE inhibitor or ARB                                                                                                                                                                                                                                                                                                   |
| Appropriate referral to a nephrologist | Patients who have an outpatient visit to a nephrologist (based on physician billing codes) in the 6 months from first evidence of meeting one of the referral criteria | Patients in the prevalent diabetes cohort who meet at least 1 criteria for referral to a nephrologist (sub-cohort 4): <ul style="list-style-type: none"> <li>• eGFR &lt;30 mL/min/1.73 m<sup>2</sup></li> <li>• ACR &gt;60 mg/mmol</li> <li>• eGFR &lt;45 mL/min/1.73 m<sup>2</sup> and ACR &gt;30 – 60 mg/mmol</li> <li>• eGFR &lt;60 mL/min/1.73 m<sup>2</sup> and at least 5 mL/min/1.73 m<sup>2</sup> decline within 6 months</li> </ul> |
|                                        | Patients who have an outpatient visit to a nephrologist (based on physician billing codes) in the 1 year from first evidence of meeting one of the referral criteria   |                                                                                                                                                                                                                                                                                                                                                                                                                                              |

Abbreviations: ACR, albumin-to-creatinine ratio; ACE, angiotensin converting enzyme; ARB, angiotensin II receptor blockers; eGFR, estimated glomerular filtration rate; NSAID, nonsteroidal anti-inflammatory drugs.

#### References

2. Tu K, Bevan L, Hunter K, Rogers JM, Young J, Nesrallah GE. Quality Indicators for the Detection and Management of Chronic Kidney Disease in Primary Care in Canada Derived from a Modified Delphi Panel Approach. *Can Med Assoc J Open*. 2017;5(1):E74–81.
3. Referral guidance: KidneyWise Clinical Toolkit. Toronto: Ontario Renal Network; 2018. Available: [www.ontariorenalnetwork.ca/en/kidney-care-resources/clinical-tools/primary-care-tools/kidneywise-contact-info](http://www.ontariorenalnetwork.ca/en/kidney-care-resources/clinical-tools/primary-care-tools/kidneywise-contact-info) (accessed 2019 Feb. 28).
